# Supplementary material for: Novel banana lectin CAR-T cells to target pancreatic tumors and tumor-associated stroma
Source: PubMed Central journal article supplement — J Immunother Cancer. 2023 Jan 18;11(1):e005891. doi: 10.1136/jitc-2022-005891 (PMC9853244; doi:10.1136/jitc-2022-005891), 2023-01-18
Supplement: jitc-2022-005891supp001.pdf [file jitc-2022-005891supp001.pdf]

## 1 Supplemental Figures

2

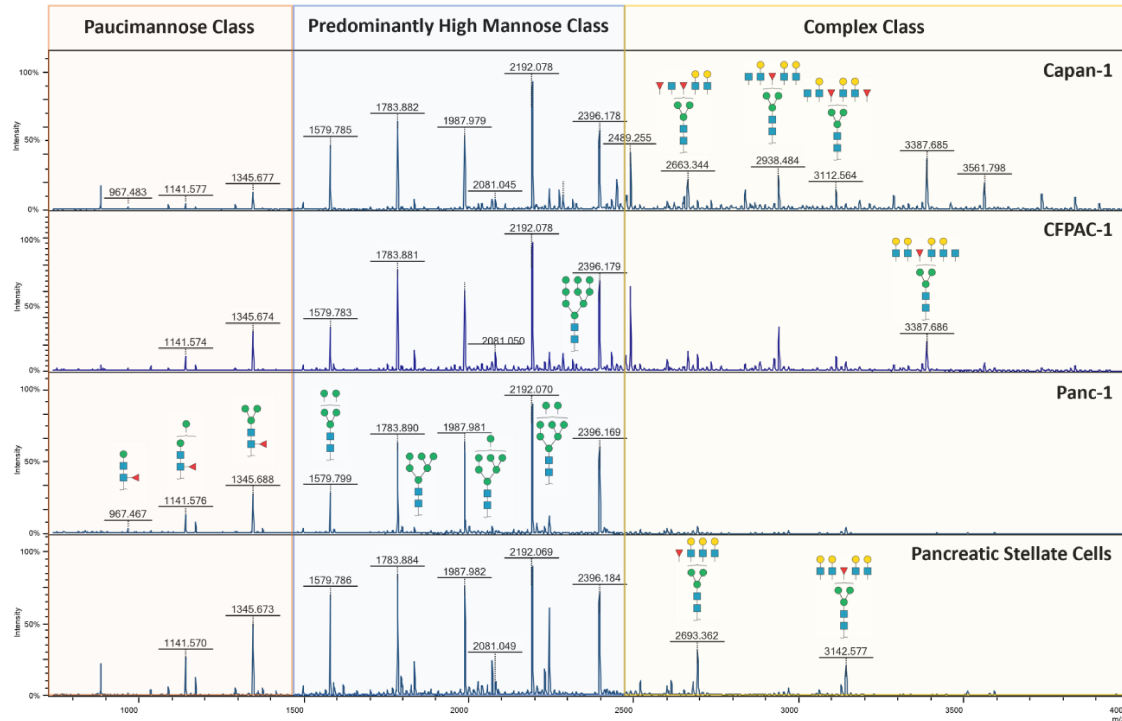

3

4

5 Suppl. Figure 1: PDAC and PSC glycan profiles. Intensity of particular glycans structures shown  
6 were quantified by MALDI-TOF mass spectrometry.

7

8

9

10

11

12

13

14

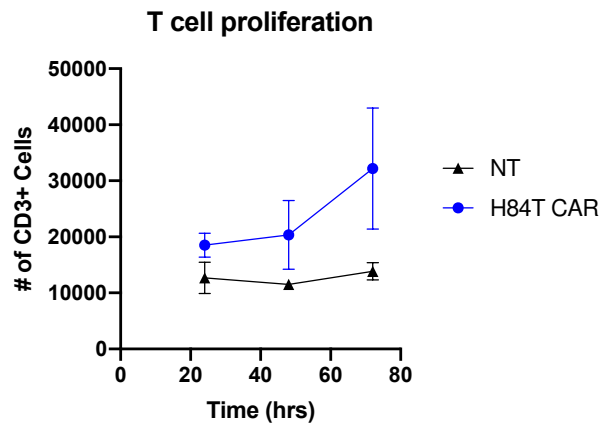

15

16 Suppl. Figure 2: H84T CAR T cell expansion.  $4 \times 10^4$  CFPAC-1 tumor cell lines and  $1 \times 10^4$  NT or  
17 H84T CAR T cells were co-cultured. T cells were quantified by CD3+ staining and counting beads  
18 collected by flow cytometry.

19

20

21

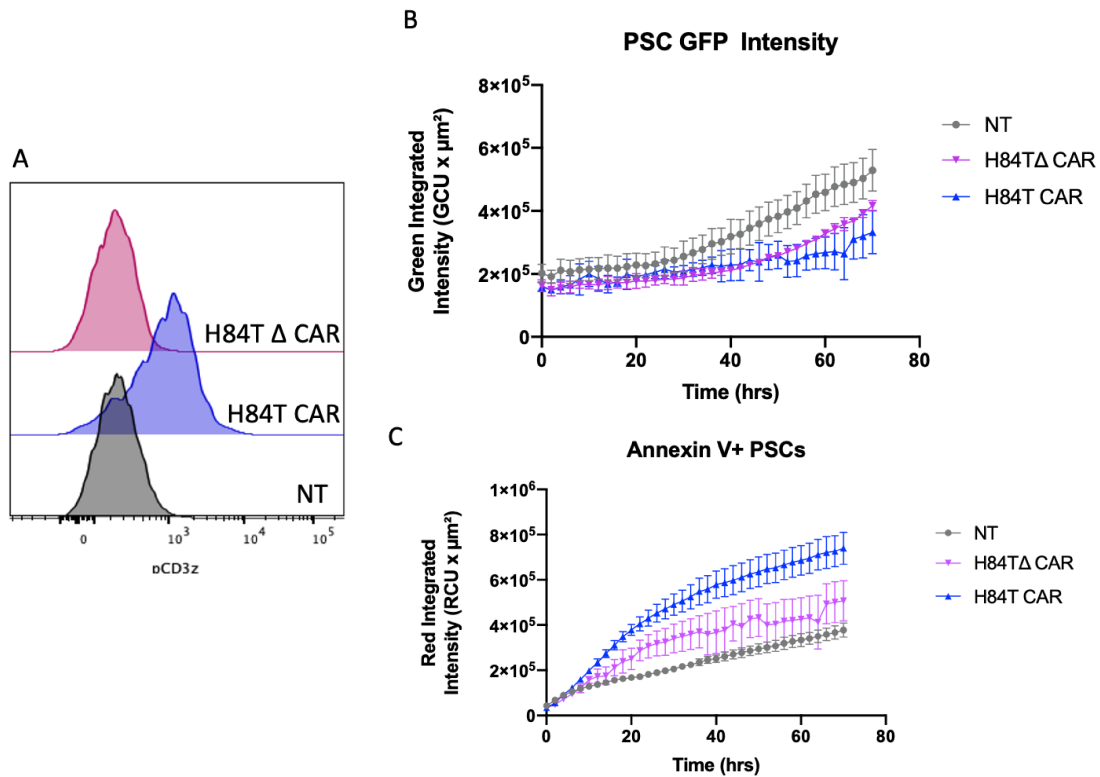

22

23 Suppl. Figure 3: H84T signaling deficient CAR T cells. A) Non-transduced, H84T and H84T $\Delta$  CAR T  
 24 cells were fixed and stained for phospho-CD3 $\zeta$  (CD247) and analyzed by flow cytometry. B)  
 25  $8 \times 10^3$  PSCs were seeded in 96-well 1% agarose coated plates.  $2 \times 10^3$  T cells were added and  
 26 green integrated intensity of CSFE labeled PSC spheroids were quantified by Incucyte live image  
 27 analysis post T cell addition over time. Results are an average of 4 technical replicates of 3  
 28 different donors. B) Annexin V staining quantification of PSC spheroids treated with indicated T  
 29 cells by Incucyte live image analysis.

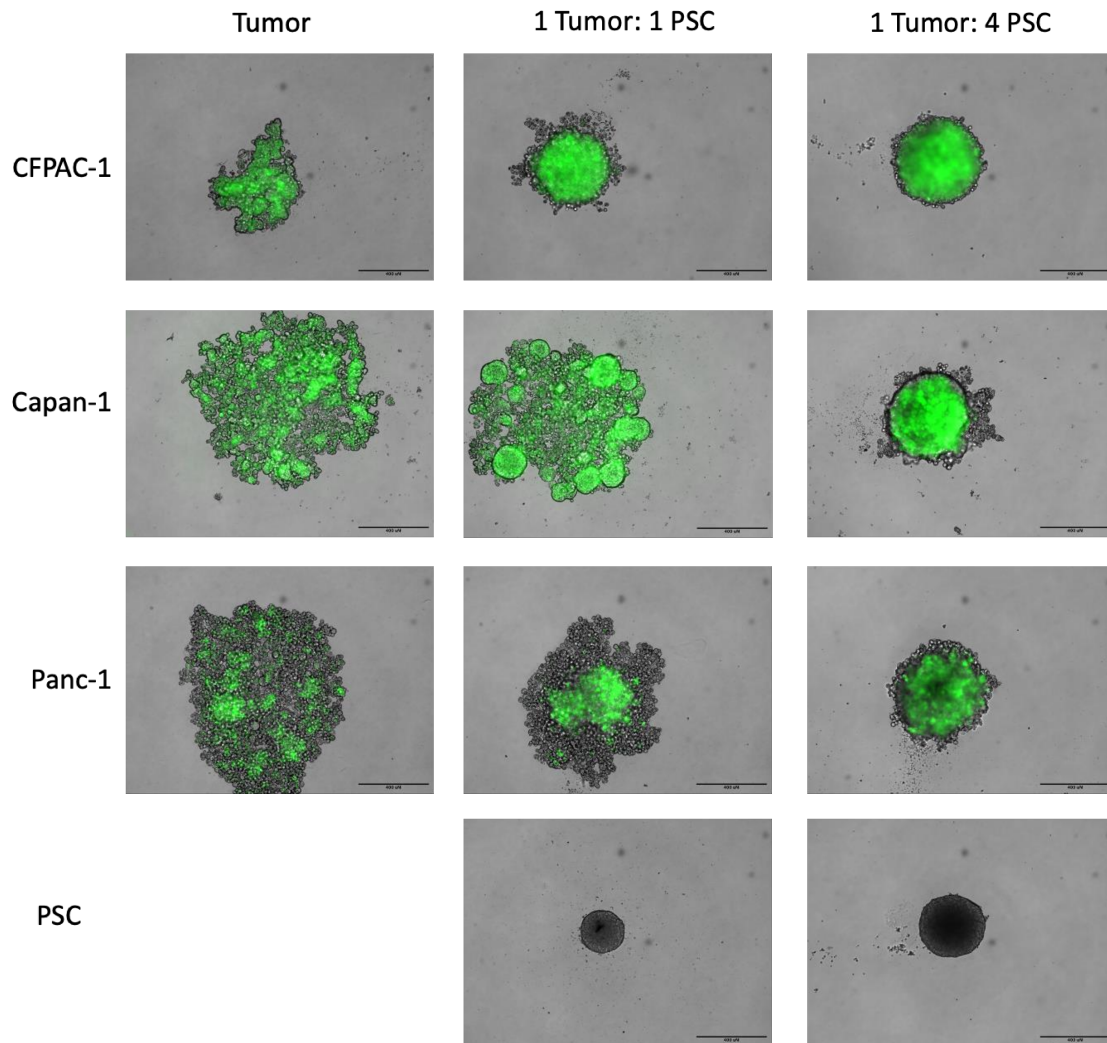

30

31

32 Suppl. Figure 4: PDAC tumor cell lines form 3D spheroids with the addition of PSCs.  $2 \times 10^3$  GFP33 labeled tumor cell lines were added to 1% agarose coated 96 well plates.  $2 \times 10^3$  or  $8 \times 10^3$  PSCs

34 were added to tumor cell lines and spheroids formed. Images were acquired 48hr post tumor

35 and PSC cell addition by Incucyte live image analysis.

36

37

38

39

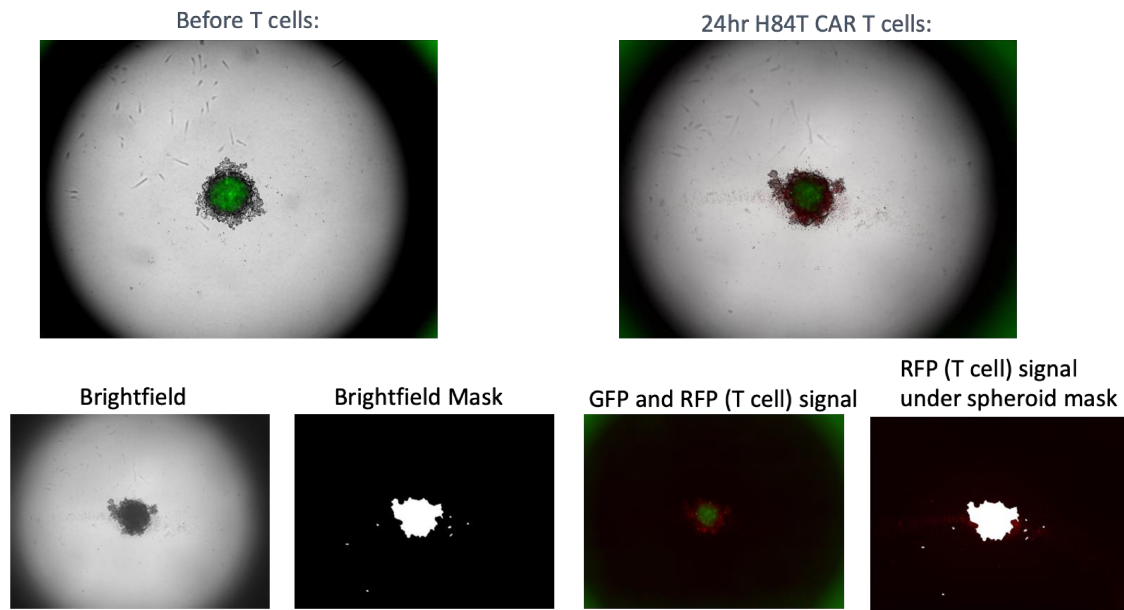

40

41

42 Suppl. Figure 5: T cell infiltration assay on Incucyte live imaging system.  $2 \times 10^3$  GFP labeled  
43 CFPAC-1 tumor cells and  $8 \times 10^3$  PSCs were added to 1% agarose coated 96 well plates.  $1 \times 10^3$  cell  
44 tracker red labeled T cells were then added 96hrs later. Whole spheroid analysis was  
45 performed. The brightfield mask was used to define the borders to detect the RFP signal from T  
46 cells. RFP intensity was calculated by Incucyte imaging software and measured over time as  
47 shown in Figure 5.

48

49

50

51

52

53

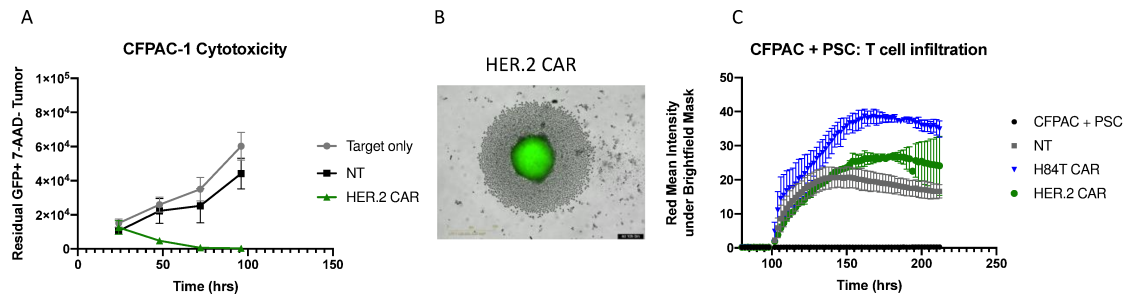

54

55 Suppl Figure 6: HER.2 CAR T cells target PDAC tumors but cannot infiltrate PSC spheroids. A) Co-

56 culture of CFPAC-1 PDAC tumor cell lines with NT or HER.2 CAR T cells at a 4:1 ratio. Residual

57 viable tumor cells labeled with GFP fFluc were quantified by flow cytometry, 7-AAD staining and

58 absolute counting beads. Samples were collected at 24, 48, 72, and 96hrs post T cell addition.

59 n=4 donors. B)  $4 \times 10^3$  PSCs labeled with CFSE were seeded in a 1% agarose coated 96-well plate

60 and allowed to form spheroids for 24hrs.  $2 \times 10^3$  NT or HER.2 CAR T cells were then added and

61 images were acquired every 2hrs for 4 days by Incucyte live imaging system. Representative

62 image of one donor T cell and spheroids are shown 96hr post T cell addition. C)  $2 \times 10^3$  GFP

63 labeled CFPAC-1 tumor cells and  $8 \times 10^3$  PSCs were co-cultured in 1% agarose coated 96 well

64 plates for 96hrs.  $1 \times 10^3$  NT, H84T or HER.2 CAR T cells labeled with cell tracker red were then

65 added and spheroids were imaged every 2hrs on the whole spheroid imaging setting. The red

66 intensity of T cells quantified under the brightfield mask is graphed. Average of 2 donors with

67 quadruplicates are shown. Linear regression analysis comparing the slope of H84T CAR vs HER.2

68 CAR  $p < 0.001$ .

69

70

71

72

73

74

75

76

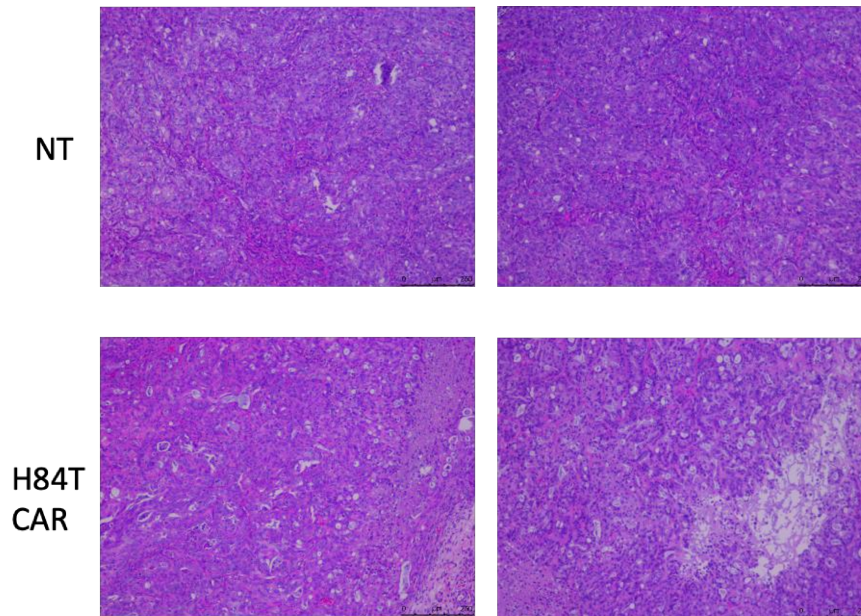

77

78

79

80 Suppl. Figure 7: Representative H&amp;E staining of resected tumors treated with either NT or H84T

81 CAR T cells. Images were then converted to binary signal with ImageJ analysis software and

82 pixel count was quantified to determine tumor density.

83

84

85

86

87

88

89

90

91

92

93

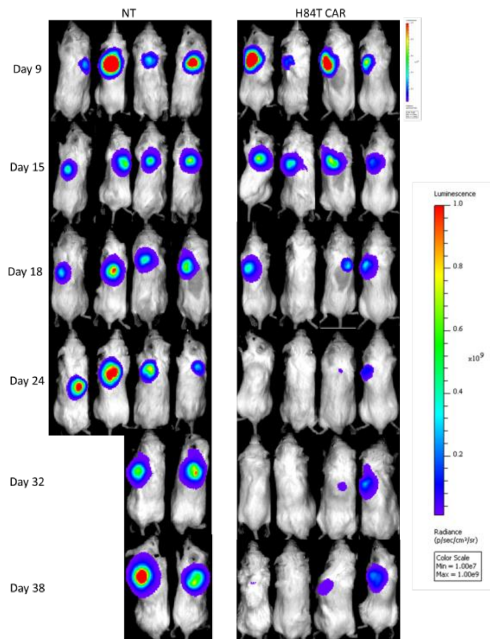

94

95

96 Supl. Figure 8: NSG MHC KO mice were engrafted subcutaneously with  $3 \times 10^6$  GFP-FfLuc  
97 labeled Capan-1 tumor cells and  $3 \times 10^6$  PSCs. Tumors were allowed to establish for 1 week and  
98 then  $1 \times 10^6$  NT or H84T CAR-T cells were delivered IV. Tumor signal was quantified by  
99 bioluminescence signaling through IVIS imaging and images for Figure 6 are shown here. N=4  
100 mice per group.

101

102

103
